# Supplementary figures and images for: The first water-soluble main-chain polyfullerene
Source: Royal Society of Chemistry journal article supplement (doi:10.1039/b003881o), 2000-01-01

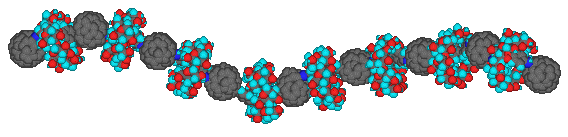


**Figure 2**.

Supplement: b003881o.doc [file b003881o.doc]
